# Supplementary material for: On the Value of Satellite Remote Sensing to Reduce Uncertainties of Regional Simulations of the Colorado River
Source: Copernicus journal article supplement (doi:10.5194/hess-2022-204), 2022-06-23
Supplement: Supplementary file 1 [file hess-2022-204-supplement.pdf]

Supporting Information for

**On the Value of Satellite Remote Sensing to Reduce Uncertainties  
of Regional Simulations of the Colorado River**

Mu Xiao<sup>1</sup>, Giuseppe Mascaro<sup>1</sup>, Zhaocheng Wang<sup>1</sup>, Kristen M. Whitney<sup>2</sup>, and Enrique R. Vivoni<sup>1,2</sup>,

<sup>1</sup>School of Sustainable Engineering and the Built Environment, Arizona State University,  
Tempe, AZ, USA

<sup>2</sup>School of Earth and Space Exploration, Arizona State University, Tempe, AZ, USA

**Contents of this file**

Table S1  
Figures S1 to S9

|                 | Baseline |      |       | Forcing-Adj |      |       | Veg-Adj |      |       | Snow-Adj |      |       |
|-----------------|----------|------|-------|-------------|------|-------|---------|------|-------|----------|------|-------|
|                 | CC       | RMSE | Bias  | CC          | RMSE | Bias  | CC      | RMSE | Bias  | CC       | RMSE | Bias  |
|                 | (-)      | (°C) | (°C)  | (-)         | (°C) | (°C)  | (-)     | (°C) | (°C)  | (-)      | (°C) | (°C)  |
| Green           | 0.93     | 7.36 | 1.08  | 0.93        | 7.44 | 2.66  | 0.94    | 6.12 | 0.54  | 0.94     | 6.37 | 0.25  |
|                 | 0.86     | 5.85 | -0.62 | 0.86        | 5.7  | 1.1   | 0.87    | 5.58 | 0.99  | 0.87     | 5.56 | 0.67  |
| Upper Colorado  | 0.91     | 6.84 | 1.24  | 0.91        | 7.12 | 2.9   | 0.92    | 5.94 | 1.01  | 0.92     | 6.53 | 0.27  |
|                 | 0.86     | 5.38 | -0.46 | 0.87        | 5.37 | 1.4   | 0.87    | 5.29 | 1.31  | 0.87     | 5.25 | 0.48  |
| Glen Canyon     | 0.93     | 7.2  | 2.37  | 0.93        | 7.39 | 3.15  | 0.93    | 6.2  | 1.29  | 0.93     | 6.39 | 1.31  |
|                 | 0.89     | 4.83 | -0.11 | 0.89        | 4.75 | 0.16  | 0.9     | 4.62 | 0.02  | 0.9      | 4.63 | -0.07 |
| San Juan        | 0.92     | 6.92 | 1.75  | 0.92        | 7.13 | 2.61  | 0.93    | 5.89 | 0.53  | 0.92     | 6.19 | 0.47  |
|                 | 0.87     | 5.09 | 0.27  | 0.87        | 4.98 | 0.62  | 0.87    | 4.83 | 0.46  | 0.88     | 4.85 | 0.27  |
| Grand Canyon    | 0.92     | 6.69 | 1.99  | 0.92        | 6.83 | 2.57  | 0.93    | 5.68 | 0.39  | 0.93     | 5.87 | -0.41 |
|                 | 0.89     | 4.77 | -1.14 | 0.89        | 4.37 | -0.18 | 0.9     | 4.2  | -0.22 | 0.9      | 4.15 | -0.27 |
| Little Colorado | 0.9      | 7.35 | 2.04  | 0.9         | 7.53 | 2.78  | 0.91    | 6.28 | 0.4   | 0.9      | 6.59 | 0.65  |
|                 | 0.87     | 4.77 | 0.42  | 0.87        | 4.65 | 0.65  | 0.88    | 4.48 | 0.42  | 0.88     | 4.51 | 0.37  |
| Lower Colorado  | 0.92     | 6.01 | 1.74  | 0.91        | 6.2  | 2.29  | 0.92    | 5.39 | 0.38  | 0.92     | 5.54 | -0.41 |
|                 | 0.91     | 4.36 | -0.79 | 0.91        | 4.08 | -0.44 | 0.91    | 3.98 | -0.52 | 0.92     | 3.9  | -0.54 |
| Gila            | 0.89     | 6.06 | 1.18  | 0.89        | 6.21 | 1.82  | 0.9     | 5.5  | 0.28  | 0.89     | 5.77 | -0.11 |
|                 | 0.87     | 4.88 | -1.39 | 0.88        | 4.54 | -0.87 | 0.88    | 4.46 | -0.93 | 0.88     | 4.43 | -1    |

**Table S1.** CC, RMSE, and Bias of LST of each subbasin for each adjustment step. Results for nighttime are shaded in grey.

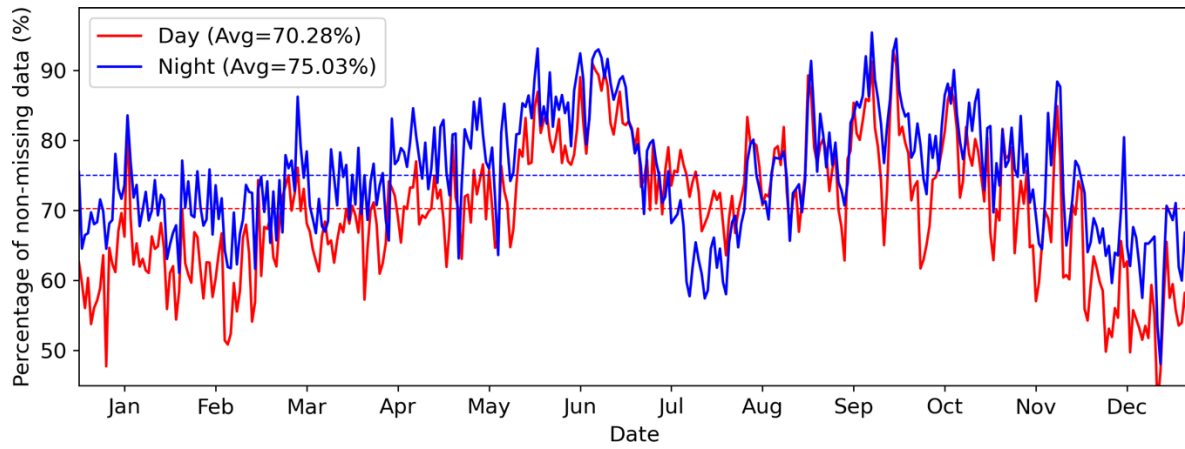

**Figure S1.** Multiyear daily mean of percentage of pixels with non-missing records of LST from MODIS for daytime and nighttime in the CRB. Overall means shown with dashed horizontal lines.

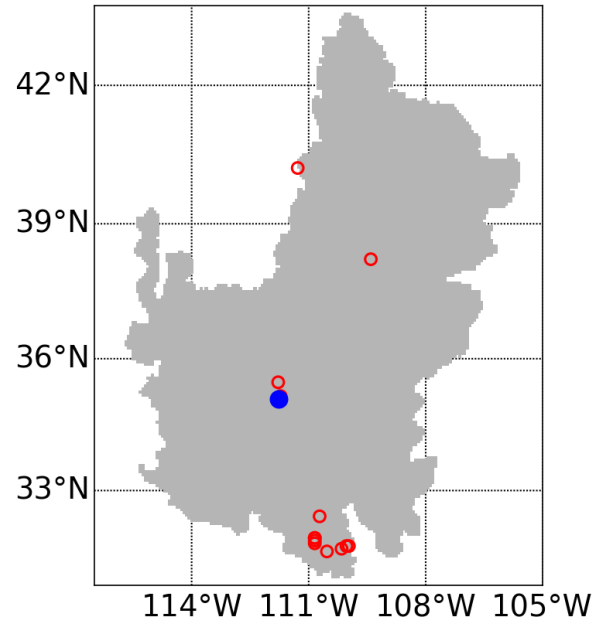

**Figure S2.** Locations of 14 eddy covariance stations with valid records longer than 300 days during 2003-2018. The location of station Fuf is marked in blue.

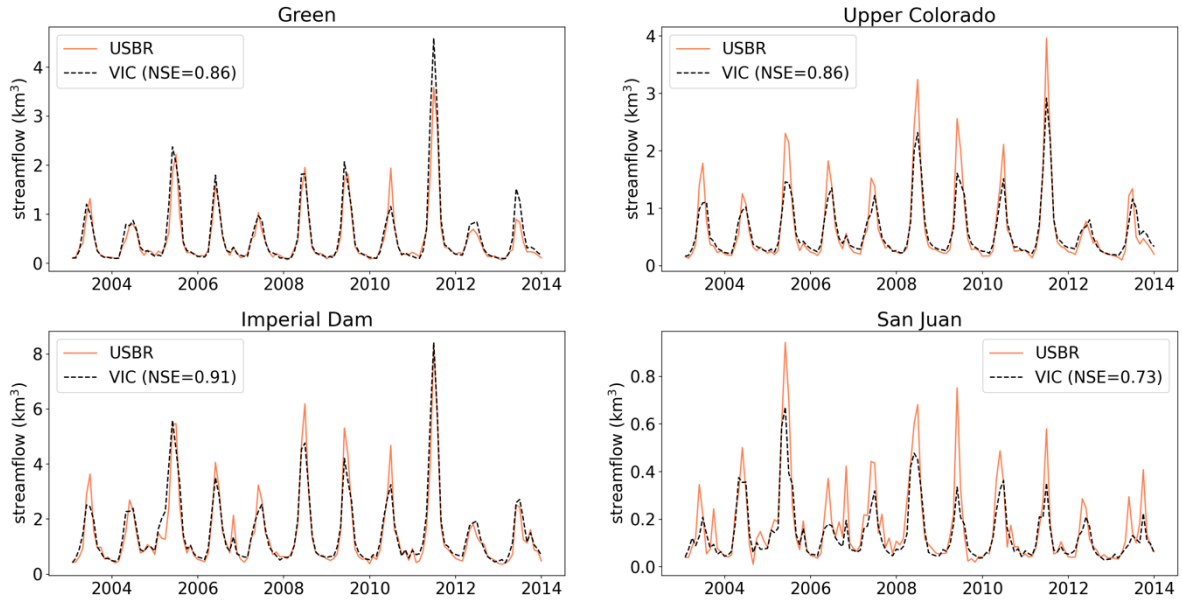

**Figure S3.** Time series of monthly runoff volume simulated by VIC (black) and the USBR reconstructed naturalized flow (orange) at three subbasins of Fig. 1b and the Imperial Dam (USGS 09429490). Nash-Sutcliffe Efficiency (NSE) is reported in the legend.

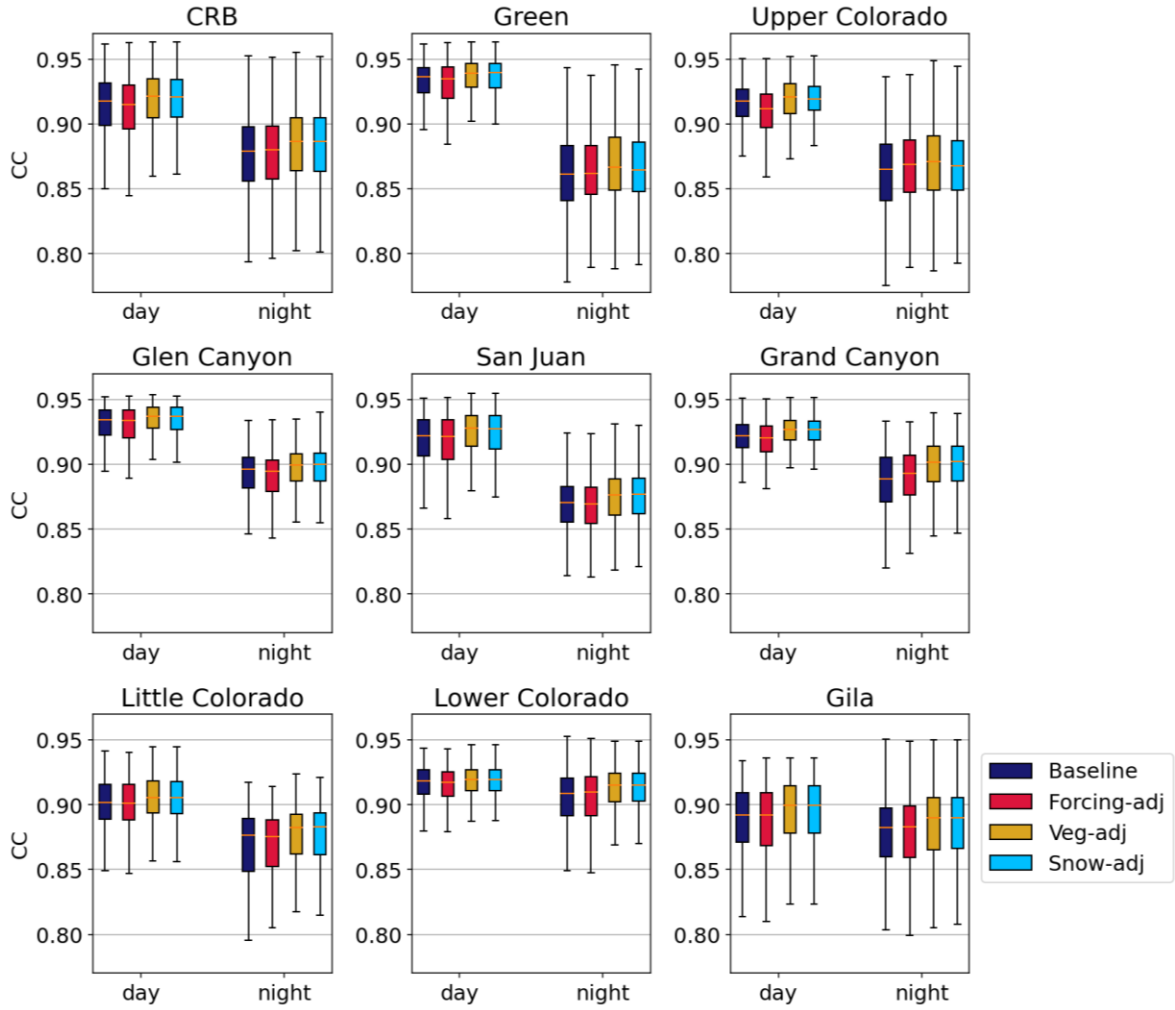

**Figure S4.** Boxplots of CC derived by comparing VIC and MODIS daytime and nighttime LST at grid cells of the CRB and each subbasin. Different colors indicate the different adjustment steps.

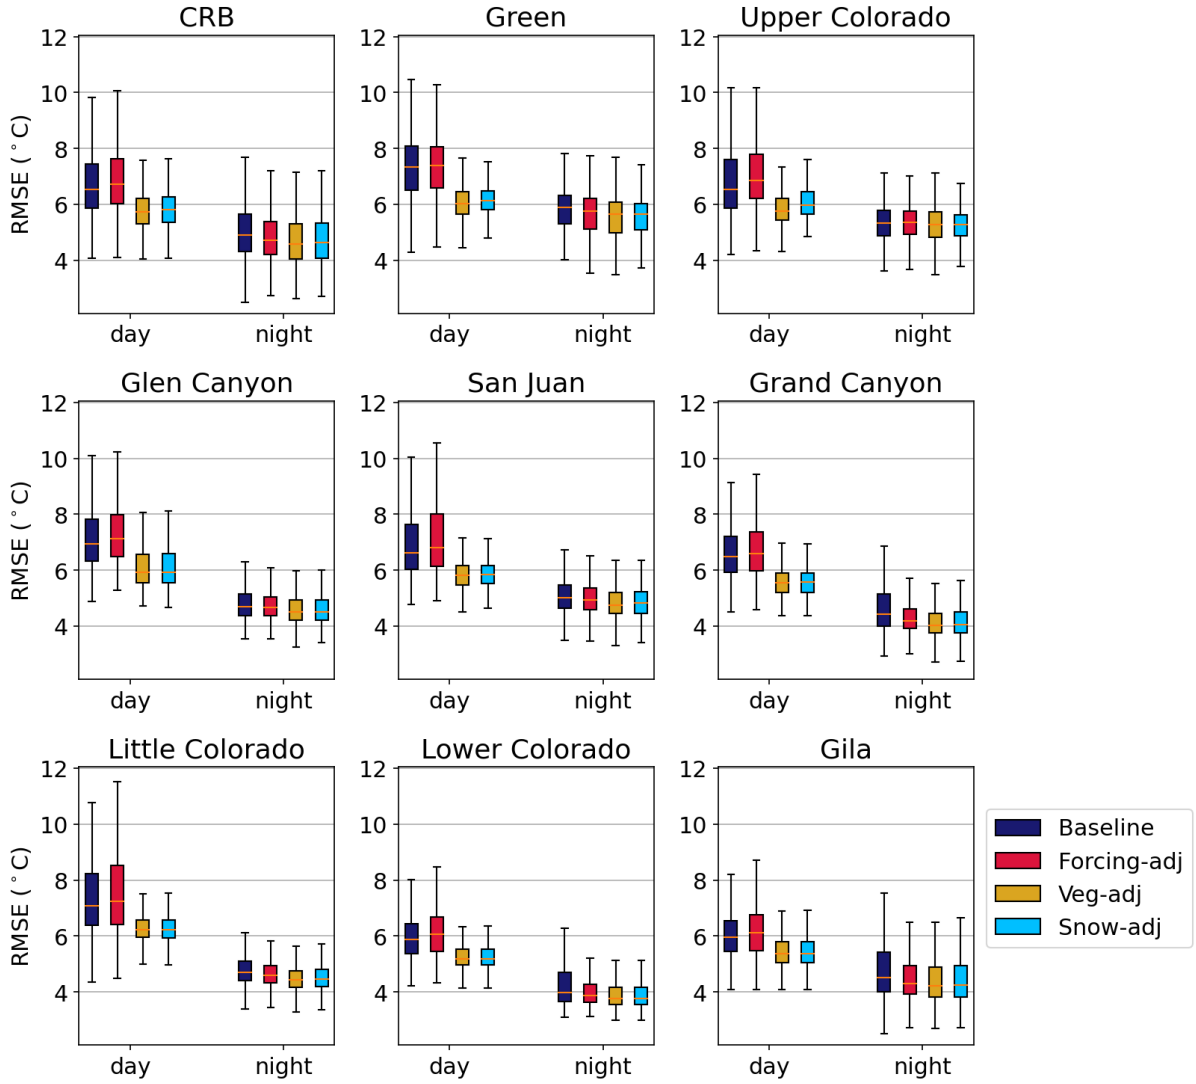

**Figure S5.** Same as S4 but for RMSE.

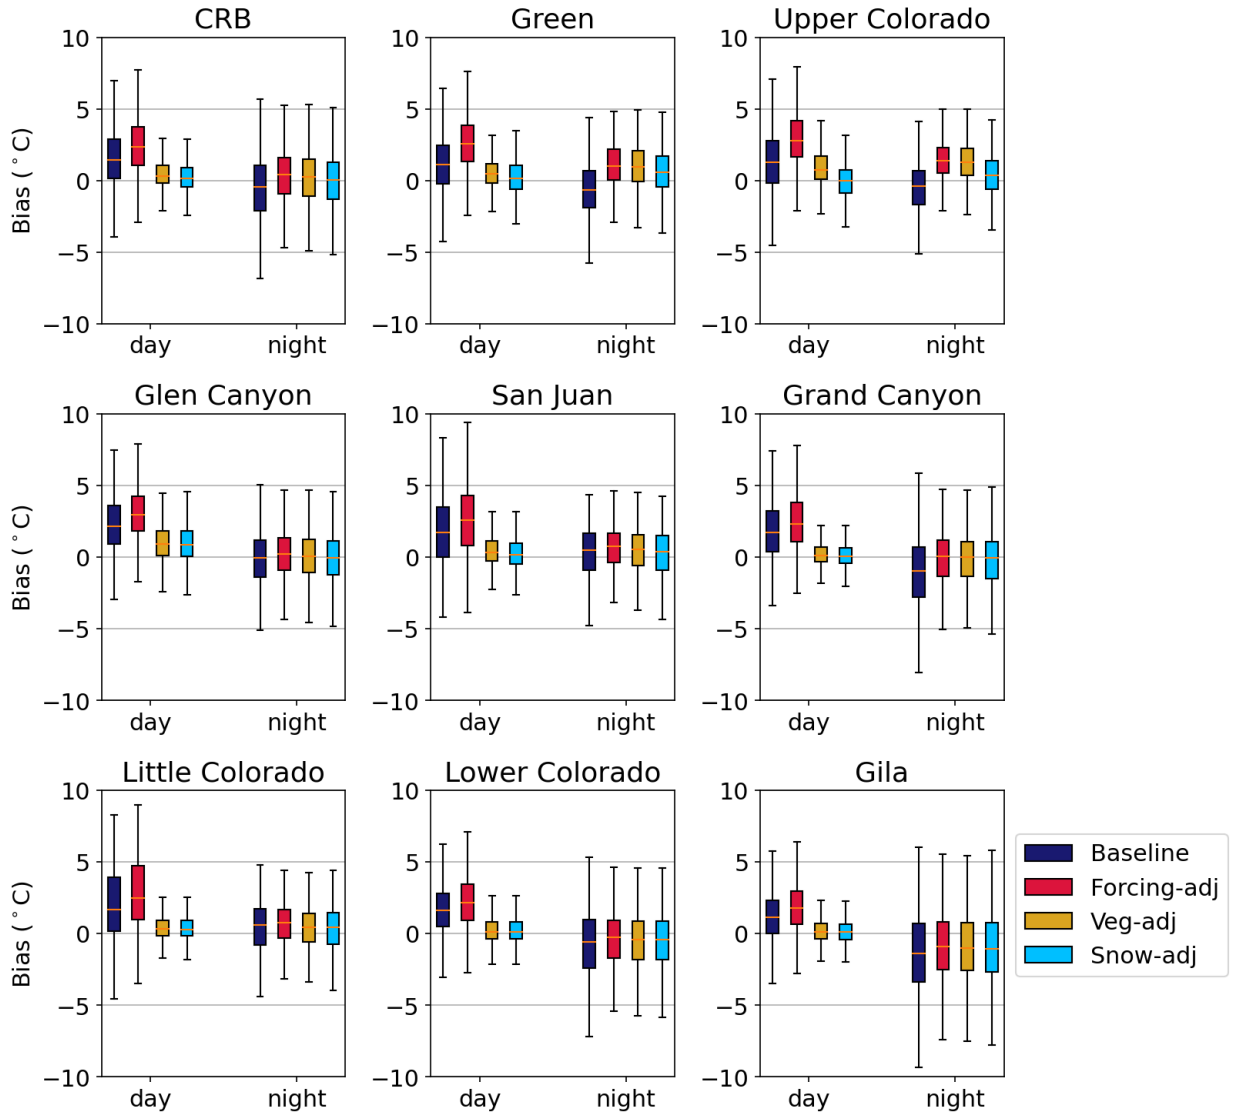

**Figure S6.** Same as S4 but for Bias.



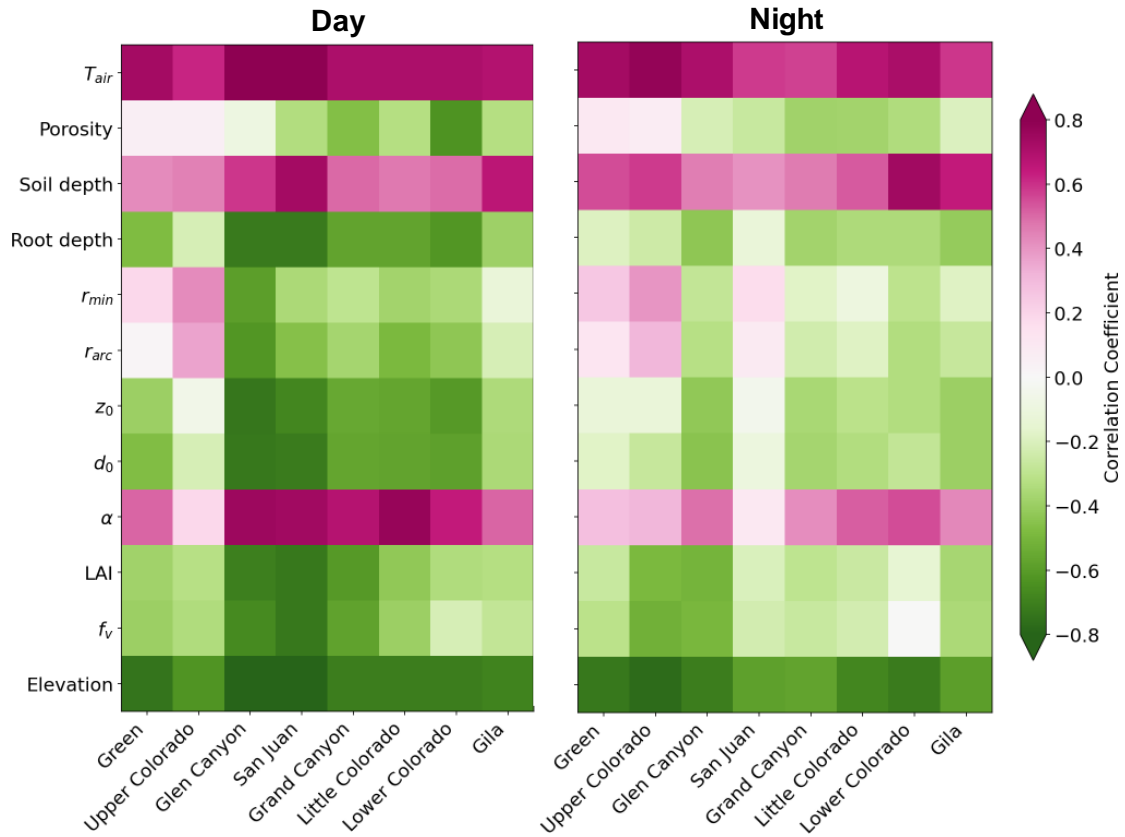

**Figure S7.** Heatmaps showing the correlation coefficient between  $T_{air}$  or key soil and vegetation parameters involved in the energy balance with CC of  $LST_M$  and  $LST_V$  at each subbasin (left: daytime, right: nighttime) for the baseline simulation.

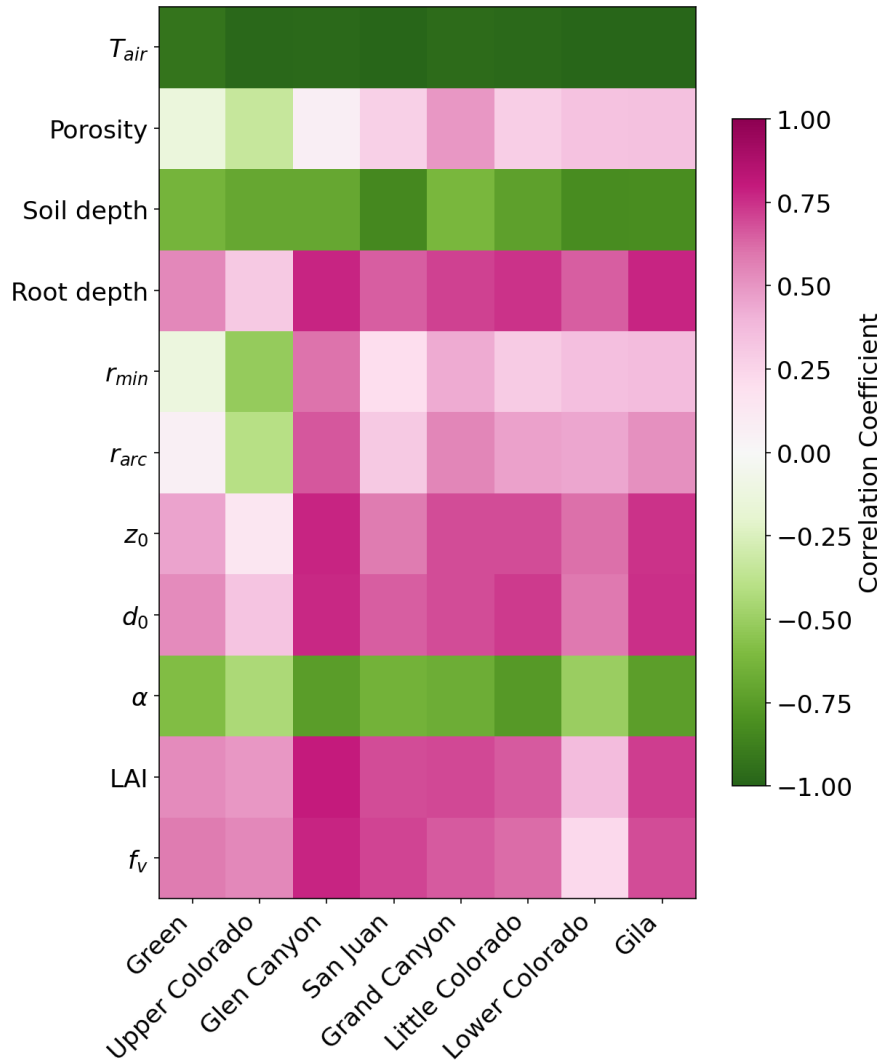

**Figure S8.** Heatmaps showing the CC between key variables involved in the energy balance and elevations at each subbasin for the baseline simulation.

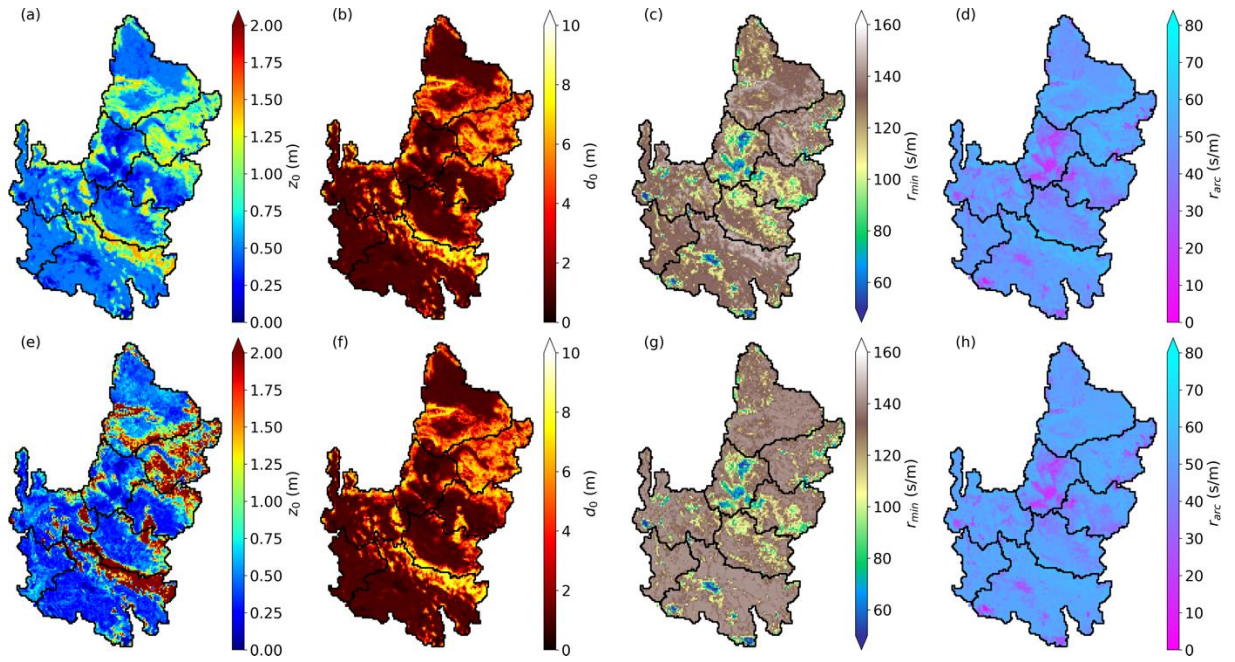

**Figure S9.** Spatial maps of pixel-averaged vegetation roughness height ( $z_0$ ), displacement height ( $d_0$ ), minimal stomatal resistance ( $r_{min}$ ), and canopy architectural resistance ( $r_{arc}$ ) for (a to d) baseline and (e to h) Veg-adj simulations.
