# Supplementary material for: On the Value of Satellite Remote Sensing to Reduce Uncertainties of Regional Simulations of the Colorado River
Source: Copernicus journal article supplement (doi:10.5194/hess-2022-204), 2022-06-23
Supplement: Supplementary file [file hess-2022-204-AC4-supplement.pdf]

**Table R1.** Structural Similarity Index Measure (SSIM), Spatial Efficiency metric (SPAEF; Demirel et al., 2018), RMSE, and Bias computed for the long-term climatology of simulated and MODIS LST fields over 2003-2018.

|                            | <b>Baseline</b> | <b>Forcing-adj</b> | <b>Veg-adj</b> | <b>Snow-adj</b> |
|----------------------------|-----------------|--------------------|----------------|-----------------|
| <b>SSIM<br/>Daytime</b>    | 0.881           | 0.878              | 0.927          | 0.927           |
| <b>SSIM<br/>Nighttime</b>  | 0.662           | 0.703              | 0.698          | 0.701           |
| <b>SPAEF<br/>Daytime</b>   | 0.763           | 0.798              | 0.925          | 0.930           |
| <b>SPAEF<br/>Nighttime</b> | 0.746           | 0.796              | 0.806          | 0.835           |
| <b>RMSE<br/>Daytime</b>    | 2.701           | 3.256              | 1.624          | 1.597           |
| <b>RMSE<br/>Nighttime</b>  | 2.394           | 1.965              | 1.958          | 1.952           |
| <b>Bias<br/>Daytime</b>    | 1.552           | 2.493              | 0.538          | 0.331           |
| <b>Bias<br/>Nighttime</b>  | -0.607          | 0.242              | 0.135          | -0.076          |

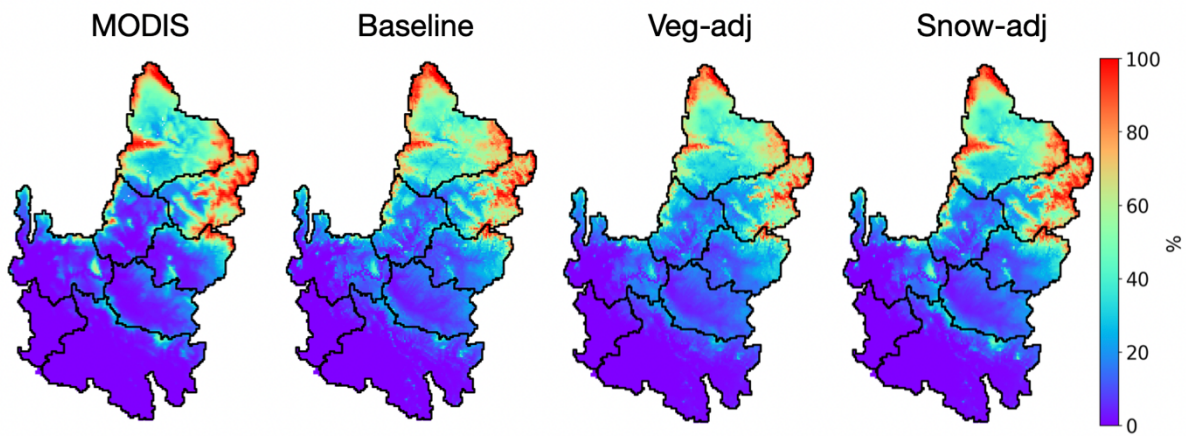

**Figure R1.** Long-term climatology of monthly snow cover (in %) derived from MODIS observations and VIC simulations in the snow season (November-May) over 2003-2018.

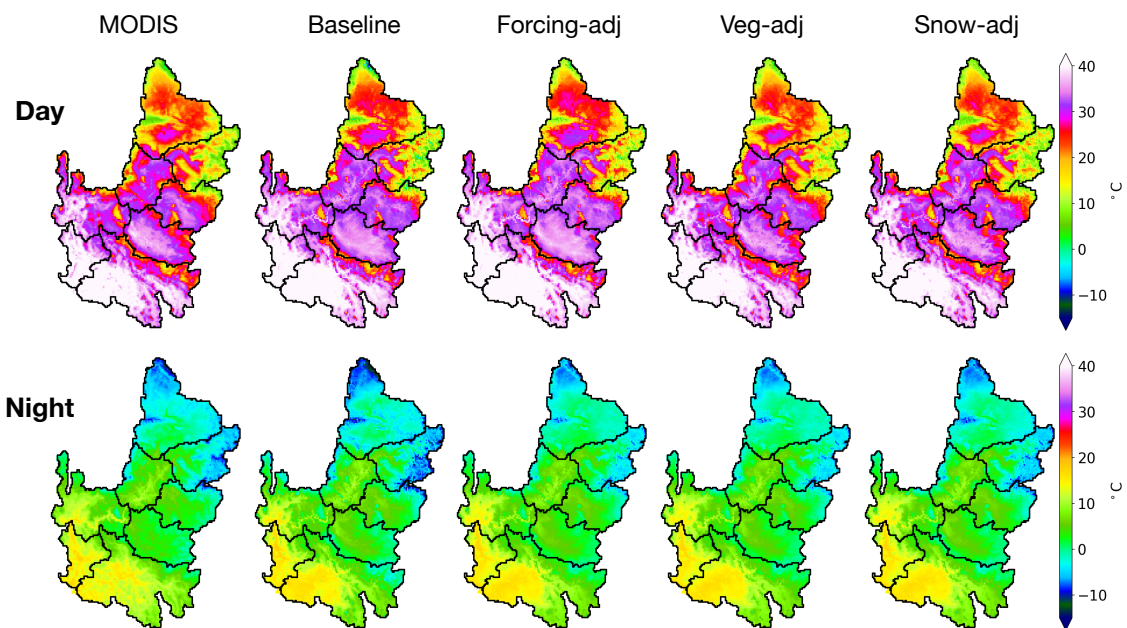

**Figure R2.** Long-term climatology of LST over 2003-2018 derived from MODIS observations and VIC simulations for each calibration step. Top (bottom) row is the daytime (nighttime) LST.

**Reference:**

Demirel, M. C., Stisen, S., and Koch, J.: SPAEF: SPATial Efficiency, <https://doi.org/10.5281/ZENODO.1158890>, 2018.
